# Supplementary material for: Widely used hardly known. An insight into electric and dynamic properties of formamidinium iodide
Source: Royal Society of Chemistry journal article supplement (doi:10.1039/c8ra03871f), 2018-01-01
Supplement: c8ra03871f2.pdf [file c8ra03871f2.pdf]

## SUPPLEMENTARY MATERIALS

### Widely Used Hardly Known.

### An Insight into Electric and Dynamic Properties of Formamidinium Iodide

K. Mencil,<sup>a</sup> P. Durlak,<sup>a</sup> M. Rok,<sup>a</sup> R. Jakubas,<sup>a</sup> J. Baran,<sup>b</sup> W. Medycki,<sup>c</sup> A. Ciżman<sup>d</sup> and

A. Piecha-Bisiorek<sup>a\*</sup>

<sup>a</sup>*Faculty of Chemistry, University of Wrocław, Joliot-Curie 14, 50-383 Wrocław, Poland*

<sup>b</sup>*Institute of Low Temperature and Structure Research, Polish Academy of Science, Okólna, PO Box 937, 50-950 Wrocław 2, Poland*

<sup>c</sup>*Institute of Molecular Physics, Polish Academy of Science, M. Smoluchowskiego 17, 60-179 Poznań, Poland*

<sup>d</sup> *Division of Experimental Physics, Wrocław University of Science and Technology, Wybrzeże Wyspiańskiego 27, 50-370 Wrocław, Poland*

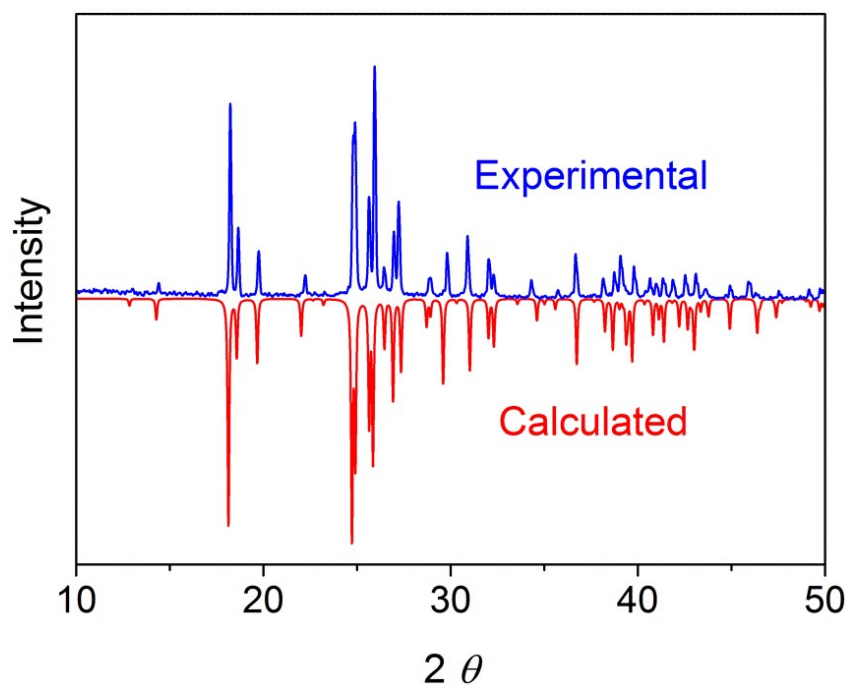

**Figure S1.** Calculated (red) and experimental (blue) X-ray powder diffraction data for **FAI**.

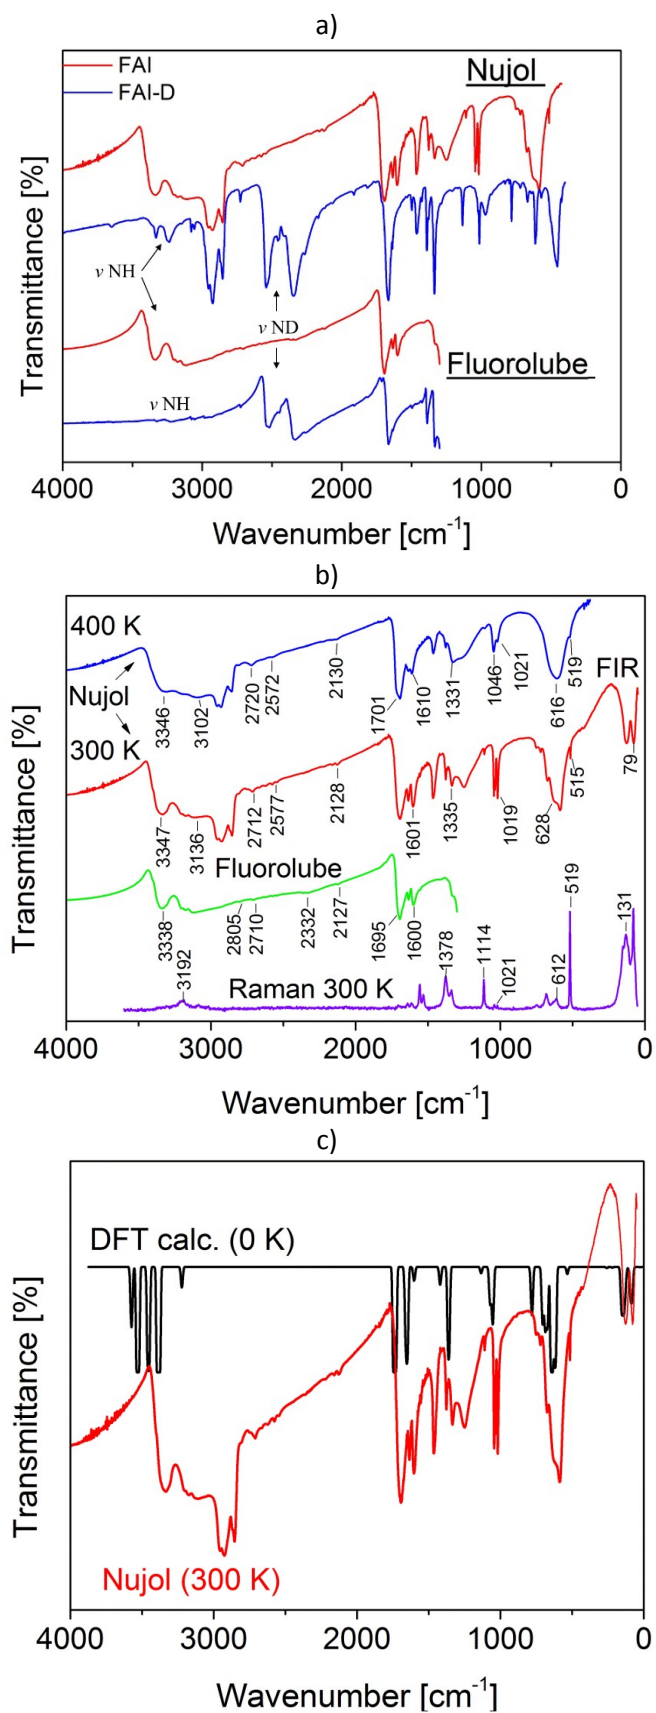

**Figure S2.**(a) The infrared spectra of the powdered **FAI** sample and **FAI-d** (deuterated sample); (b) The infrared spectra of the powdered **FAI** sample in Nujol (300 and 400 K) CsI, Fluorolube and FIR at 300 K and the FT-Raman spectra at 300 K; (c) Comparison of the calculated (black) and experimental (red) spectra for **FAI** crystal.

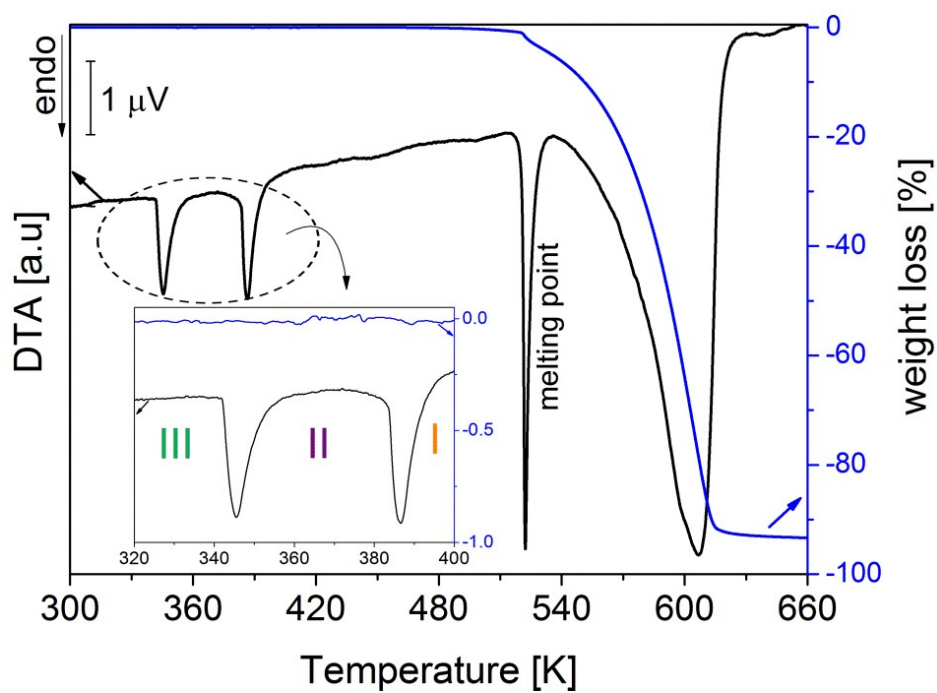

**Figure S3.** Simultaneous thermogravimetric and differential thermal analyses scan (ramp rate:  $5 \text{ K min}^{-1}$ ).

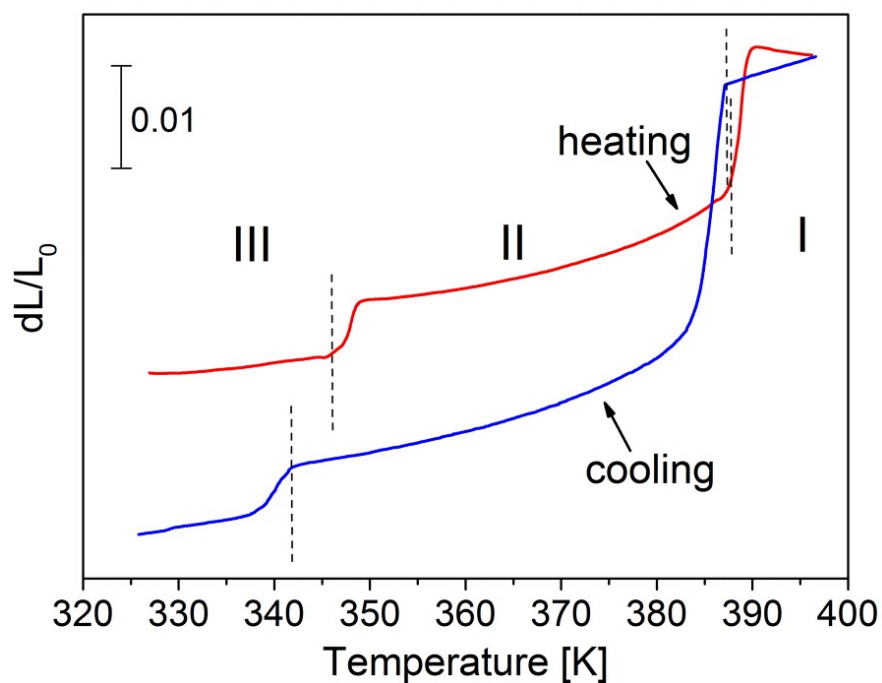

**Figure S4.** Dilatometric measurements for FAI (the scanning rate of  $3 \text{ K min}^{-1}$ ).

**Table S1.** Comparison of the experimental and calculated selected vibrational frequencies in ( $\text{cm}^{-1}$ ) for the **FAI**.

| IR spectra |           |           |           |      |                                                                         |
|------------|-----------|-----------|-----------|------|-------------------------------------------------------------------------|
|            | In Nujol  |           | DFT calc. |      | Assignments                                                             |
| T = 300 K  | T = 350 K | T = 400 K | T = 0 K   |      |                                                                         |
| 3398 w sh  |           |           |           | 3575 | $\nu_{\text{as}}(\text{NH}_2)$                                          |
| 3337 s     | 3336 s    |           |           | 3528 | $\nu_{\text{as}}(\text{NH}_2)/\nu_{\text{NH}}\dots\text{I}$             |
| 3310 s sh  | 3308 s sh | 3320 s    |           |      | $\nu_{\text{as}}(\text{NH}_2)/\nu_{\text{NH}}\dots\text{I}$             |
| 3203 s     | 3200 s    | 3199 vs   |           |      | $\nu_{\text{a}}\text{NH}_2/\nu_{\text{NH}}\dots\text{I}$                |
| 3176 s     |           |           |           | 3456 | $\nu_{\text{as}}(\text{NH}_2)/\nu_{\text{NH}}\dots\text{I}$             |
| 3129* vs   |           |           |           |      |                                                                         |
| 3106 s     | 3103 s    | 3102 vs   |           | 3385 | $\nu_{\text{s}}(\text{NH}_2)$                                           |
| 3112* vs   |           |           |           | 3223 | $\nu(\text{CH})$                                                        |
|            |           |           |           |      | $\nu(\text{CH})$                                                        |
| 2984 vwsh  |           |           |           |      | $\nu(\text{CH})$                                                        |
| 2923* vs   |           |           |           |      | $\nu(\text{CH})$                                                        |
| 2852* vs   |           |           |           |      |                                                                         |
| 2804* s    |           |           |           |      |                                                                         |
| 2723 m     |           |           |           |      |                                                                         |
| 2709 m     | 2714 m    | 2720 m    |           |      |                                                                         |
| 2618 msh   |           |           |           |      |                                                                         |
| 2577 m     | 2574 m    | 2572 m    |           |      |                                                                         |
| 2547 m     |           |           |           |      |                                                                         |
| 2222 w     | 2221 w    | 2224 w    |           |      |                                                                         |
| 2161 w     | 2160 w    | 2162 w    |           |      |                                                                         |
| 2128 w     | 2124 w    | 2130 w    |           |      |                                                                         |
| 1695 vs    | 1698 vs   | 1701 vs   |           | 1745 | $\nu_{\text{as}}(\text{NCN}) + \delta(\text{NH}_2) + \delta(\text{CH})$ |
| 1676 s sh  |           |           |           |      |                                                                         |
| 1636 s     | 1636 s    | 1636 s    |           | 1662 | $\delta(\text{NH}_2)$                                                   |
| 1601 vs    | 1606 vs   | 1610 s    |           | 1604 | $\delta(\text{NH}_2) + \delta(\text{CH})$                               |
| 1557 m sh  |           |           |           | 1593 | $\delta(\text{NH}_2) + \delta(\text{CH})$                               |
|            |           |           |           |      | $\delta(\text{NH}_2)$                                                   |
| 1366 m     | 1365 m    | 1366 w    |           | 1417 | $\nu_{\text{s}}(\text{NCN})$                                            |
| 1335 m     | 1332 m    | 1331 m    |           | 1360 | $\delta(\text{CH}) + \nu(\text{C-N}) + \rho(\text{NH}_2)$               |
| 1306 m     |           |           |           |      |                                                                         |
| 1249 s     | 1244 m    | 1256 m sh |           | 1138 | $\rho(\text{NH}_2)$                                                     |
| 1170 w sh  |           |           |           |      |                                                                         |
| 1157 w sh  |           |           |           |      |                                                                         |
| 1110 w     | 1107 w    | 1105 vw   |           |      | $\tau(\text{NH}_2)$                                                     |
| 1044 s     |           |           |           | 1134 | $\rho(\text{NH}_2)$                                                     |
| 1036 s     | 1034 m    | 1046 m    |           | 1073 | $\tau(\text{NH}_2) + \gamma(\text{CH})$                                 |
| 1019 s     | 1014 m    | 1021 w    |           | 1051 | $\rho(\text{NH}_2) + \delta(\text{CH}) + \gamma(\text{CH})$             |
| 891 w sh   |           |           |           |      |                                                                         |
